# Supplementary material for: Impacts of Ground Fissures on Soil Properties in an Underground Mining Area on the Loess Plateau, China
Source: MDPI journal article supplement (doi:10.3390/land11020162), 2022-01-20
Supplement: s1 [file s1]

**Table S1.** Characteristics of ground fissures.

| Number | Width (m) | Depth (m) | Length (m) | Slope (°) | Vegetation coverage<br>(ratios) |
|--------|-----------|-----------|------------|-----------|---------------------------------|
| 1      | 0.25      | 2.3       | 0.88       | 5         | 0.45                            |
| 2      | 0.15      | 0.9       | 6          | 1         | 0.6                             |
| 3      | 0.73      | 0.7       | 10         | 35        | 0.11                            |
| 4      | 0.08      | 0.8       | 4          | 14        | 0.46                            |
| 5      | 0.7       | 0.5       | 7          | 30        | 0.05                            |
| 6      | 0.12      | 1.2       | 6.5        | 28        | 0.25                            |
| 7      | 0.9       | 1         | 4.7        | 31        | 0.17                            |
| 8      | 0.12      | 2.3       | 7.4        | 7         | 0.9                             |
| 9      | 0.48      | 2.1       | 5.5        | 36        | 0.24                            |
| 10     | 0.18      | 2.5       | 13         | 4         | 0.56                            |
| 11     | 0.44      | 0.7       | 5.5        | 21        | 0.3                             |
| 12     | 0.09      | 0.54      | 3.2        | 20        | 0.6                             |
| 13     | 0.26      | 0.65      | 1.2        | 26        | 0.35                            |
| 14     | 0.05      | 0.59      | 8.6        | 5         | 0.85                            |
| 15     | 0.5       | 0.88      | 25.2       | 13        | 0.22                            |
| 16     | 0.5       | 0.83      | 12         | 23        | 0.33                            |
| 17     | 0.22      | 1.45      | 1.85       | 26        | 0.3                             |
| 18     | 0.68      | 1.57      | 11.3       | 35        | 0.13                            |
| 19     | 0.25      | 1.51      | 11.3       | 22        | 0.2                             |
| 20     | 0.22      | 2         | 17.2       | 18        | 0.88                            |
| 21     | 0.6       | 0.55      | 4.4        | 35        | 0.32                            |
| 22     | 0.04      | 0.43      | 6          | 34        | 0.42                            |
| 23     | 0.13      | 1.5       | 3.7        | 6         | 0.8                             |
| 24     | 0.7       | 2.3       | 24         | 16        | 0.25                            |
| 25     | 0.27      | 1.8       | 1.1        | 3         | 0.2                             |
| 26     | 0.17      | 1.8       | 1.1        | 3         | 0.38                            |
| 27     | 0.06      | 0.5       | 13.3       | 6         | 0.78                            |
| 28     | 0.35      | 3.7       | 0.7        | 19        | 0.45                            |
| 29     | 0.3       | 0.45      | 9          | 24        | 0.25                            |
| 30     | 0.65      | 0.75      | 12         | 34        | 0.18                            |
| 31     | 0.17      | 0.55      | 24         | 15        | 0.3                             |
| 32     | 0.32      | 0.69      | 24         | 32        | 0.12                            |
| 33     | 0.19      | 0.94      | 11         | 10        | 0.55                            |
| 34     | 0.09      | 0.7       | 4.9        | 14        | 0.4                             |
| 35     | 0.28      | 0.75      | 24.3       | 18        | 0.35                            |
| 36     | 0.22      | 1.5       | 6          | 20        | 0.4                             |
| 37     | 0.66      | 0.5       | 33.5       | 21        | 0.16                            |
| 38     | 0.08      | 0.53      | 8          | 7         | 0.66                            |
| 39     | 0.4       | 1.6       | 19.5       | 27        | 0.55                            |
| 40     | 0.46      | 0.3       | 11         | 25        | 0.15                            |
